# Supplementary material for: Complementarity determining regions in SARS-CoV-2 hybrid immunity
Source: PubMed Central journal article supplement (PMC9990870; doi:10.3389/fimmu.2023.1050037), 2023-02-21
Supplement: DataSheet_1.pdf [file DataSheet_1.pdf]

## Supplementary Information

### Legends to Figures Extended Data

#### Extended Data Figure 1

Overview of the bio-informatics analysis to process the raw LC-MS/MS data into CDR peptide sequences. LS-MS/MS output and peptide sequences fulfilling the criteria specified in the boxes with grey letters were excluded for further analysis. Software packages for data pre-processing and statistical analyses are specified in the blue boxes. Identified CDR peptides (indicated in bold) were used for further statistical analysis: MixOmics (R) and Qlucore Omics Explorer. ALC: Average of Local Confidence.

#### Extended Data Figure 2

CDR profile and anti-S antibodies before and after two doses of the BN162b2 vaccine (6 weeks after first dose) in naïve individuals and in individuals that had been infected with SARS-CoV-2 before vaccination (experiment #2).

The figure shows anti-S antibody levels (Panel A), PCA analysis (Panel B), heat map after hierarchical clustering of the CDR features (Panel C) and age and gender distribution of the included individuals (Panel D). The heat map indicates the variance (from -2 to 2) compared to the mean (0) for each peptide feature. The included vaccination/infection-induced CDR-derived peptides were those that revealed discriminative by sPLS-DA analysis. The green-labeled CDR-derived peptides were also revealed discriminative by sPLS-DA analysis in experiment #1 (Figure 1).

The median [25<sup>th</sup>-75<sup>th</sup> percentile] anti-S antibody levels (AU/mL) were 5 [1.5-5.6], 8698 [7182-13332], 873 [459-2462], and 36834 [35238-41898] pre-vaccination naïve, post-vaccination naïve, pre-vaccination infected and post-vaccination infected, respectively.

#### Extended Data Figure 3

Heat maps representing 19 CDR-derived peptides that revealed discriminative by sPLS-DA in both experiment #1 and experiment #2. Heat maps are shown for experiment #1 and #2, as well as for experiment #3 and #4 as far as the CDR-derived peptides were discriminative by sPLS-DA in experiments #3 and/or #4. The heat maps indicate the variance (from -2 to 2) compared to the mean (0) for each peptide feature.

#### Extended Data Figure 4

CDR profile and anti-S antibodies before, 3 months and 10 months after BN162b2 vaccination (two doses) in naive individuals and in individuals that experienced a breakthrough infection between 3 months and 10 months after vaccination (experiment #4).

The figure shows the anti-S antibody levels (Panel A), PCA analysis (Panel B), heat map after hierarchical clustering of the CDR features (Panel C) and age and gender distribution of the included individuals with timing of the breakthrough infection (Panel D). The heat map indicates the variance (from -2 to 2) compared to the mean (0) for each peptide feature. The included vaccination/infection-induced CDR-derived peptides were those that revealed discriminative by sPLS-DA analysis. The green-labeled CDR-derived peptides were also revealed discriminative by sPLS-DA analysis in experiment #3 (Figure 2).

#### Extended Data Figure 5

Heat maps representing 13 CDR-derived peptides that revealed discriminative by sPLS-DA in both experiment #1 and experiment #3. Heat maps are shown for experiment #1 and #3, as well as for experiment #2 and #4 as far as the CDR-derived peptides were discriminative by sPLS-DA in experiments #2 and/or #4. The heat maps indicate the variance (from -2 to 2) compared to the mean (0) for each peptide feature.

## Extended Data Table 1. Neutralizing activity

| Experiment 1 - Neutralizing activity (% Inhibition) |                  |                 |                  |
|-----------------------------------------------------|------------------|-----------------|------------------|
| Naive                                               |                  | Infected        |                  |
| Pre-vaccination                                     | Post-vaccination | Pre-vaccination | Post-vaccination |
| -3,5                                                | 99,6             | -8,2            | 101,9            |
| 1,1                                                 | 98,7             | -13,6           | 99,3             |
| -9,7                                                | 100,2            | -4,4            | 99,6             |
| -15,4                                               | 95,9             | 4,9             | 98,8             |
| -14,0                                               | 68,8             | 0,8             | 101,8            |
| -3,5                                                | 98,8             | -8,6            | 98,6             |
| -7,6                                                | 99,2             | 1,6             | 99,5             |
| -10,3                                               | 82,0             |                 | 99,5             |
| -7,6                                                | 97,4             | 15,8            | 104,8            |
| -1,9                                                | 98,5             | 8,0             | 102,7            |
|                                                     |                  | 0,5             | 97,7             |

| Experiment 2 - Neutralizing activity (% Inhibition) |                  |                 |                  |
|-----------------------------------------------------|------------------|-----------------|------------------|
| Naive                                               |                  | Infected        |                  |
| Pre-vaccination                                     | Post-vaccination | Pre-vaccination | Post-vaccination |
| -7,5                                                | 95,2             | 16,9            | 100,7            |
| -6,6                                                | 97,9             | 24,3            | 107,9            |
| -8,6                                                | 103,5            | 46,5            | 104,4            |
| -12,5                                               | 97,5             | 22,0            | 99,8             |
| -3,7                                                | 102,8            |                 | 100,4            |
| -7,5                                                | 40,1             | 70,4            | 110,2            |
| 0,1                                                 | 98,7             | 103,0           | 107,2            |
| -14,5                                               | 103,8            | 56,0            | 100,4            |
| -11,6                                               | 99,6             | 40,5            | 101,5            |

Experiment 3 - Neutralizing activity (% Inhibition)

| Naive           |                           |                            | Breakthrough infection (between 3 and 10 months post-vaccination) |                           |                            |
|-----------------|---------------------------|----------------------------|-------------------------------------------------------------------|---------------------------|----------------------------|
| Pre-vaccination | 3 months post-vaccination | 10 months post-vaccination | Pre-vaccination                                                   | 3 months post-vaccination | 10 months post-vaccination |
| -10,5           | 100,8                     | 12,7                       | -1,5                                                              | 101,1                     | 115,2                      |
| -6,5            | 110,0                     | 16,5                       | -3,4                                                              | 75,4                      | 100,1                      |
| -3,7            | 102,8                     | 10,1                       | 0,8                                                               | 102,1                     | 97,8                       |
| -1,7            | 100,3                     | 26,0                       | 6,9                                                               | 97,0                      | 111,8                      |
| 11,6            | 102,3                     | 49,9                       | -3,5                                                              | 80,7                      | 101,5                      |
| -5,0            | 105,2                     | 90,2                       |                                                                   | 102,2                     | 98,3                       |

Experiment 4 - Neutralizing activity (% inhibition)

| Naive           |                           |                            | Breakthrough infection (between 3 and 10 months post-vaccination) |                           |                            |
|-----------------|---------------------------|----------------------------|-------------------------------------------------------------------|---------------------------|----------------------------|
| Pre-vaccination | 3 months post-vaccination | 10 months post-vaccination | Pre-vaccination                                                   | 3 months post-vaccination | 10 months post-vaccination |
| -1,2            | 90,7                      | 44,7                       | -18,7                                                             | 87,6                      | 98,0                       |
| -14,2           | 83,9                      | 22,9                       | -16,6                                                             | 84,9                      | 97,0                       |
| -9,9            | 93,0                      | 67,3                       |                                                                   |                           |                            |













|          |                              |             |                           |   |   |   |   |            |           |            |            |
|----------|------------------------------|-------------|---------------------------|---|---|---|---|------------|-----------|------------|------------|
| FR3-CDR3 | <b>IGHV7-4-1*05/IGHJ6*04</b> | 0/99 + 1/99 | ATLCSAEVCQCAEGK           | ✓ |   | ✓ | ✓ | 108,5/63,0 | 108,5     | 108,7/67,6 | 114,7/56,2 |
| FR3-CDR3 | <b>IGHV7-4-1*05/IGHJ6*04</b> | 0/99 + 1/99 | CSAEVCQCAEGK              | ✓ | ✓ | ✓ |   | 76,4       | 78,3      | 78,7       | 82,0       |
| CDR2-FR3 | <b>IGKV1-33*01</b>           | NA          | DASNLETGVPSRF             |   |   |   | ✓ | \          | \         | 57,4       | 49,6       |
|          | <b>IGKV1D-33*01</b>          | NA          |                           |   |   |   |   |            |           |            |            |
| CDR2-FR3 | <b>IGLV3-21*02</b>           | 67/99       | DDSDRPSGIPERF             |   | ✓ | ✓ |   | 18,8/26,6  | 30,8      | 22,8       | \          |
|          | IGLV3-21*03                  | 27/99       |                           |   |   |   |   |            |           |            |            |
| CDR2-FR3 | <b>IGLV3-21*02</b>           | 67/99       | DDTDRPSGIPERF             | ✓ |   |   |   | 37,8       | 28,2      | \          | \          |
|          | IGLV3-21*03                  | 27/99       |                           |   |   |   |   |            |           |            |            |
| CDR2-FR3 | <b>IGLV3-21*02</b>           | 67/99       | DNSDRPSGIPERF             |   |   |   | ✓ | \          | \         | \          | 27,4       |
|          | IGLV3-21*03                  | 27/99       |                           |   |   |   |   |            |           |            |            |
| CDR2-FR3 | <b>IGLV3-27*01</b>           | 98/99       | DSERPSGIPERF              |   |   | ✓ | ✓ | 26,5/21,0  | 16,4      | 28,1       | 31,3       |
| CDR2-FR3 | <b>IGLV3-27*01</b>           | 98/99       | DTERPSGIPERF              | ✓ |   |   | ✓ | 31,1       | 28,0      | 31,3       | 31,5       |
| CDR2-FR3 | <b>IGLV2-14*04</b>           | 61/99       | DVSNRPSGVSNRF             |   | ✓ |   |   | 22,4/22,2  | 40,5      | 16,3       | 8,1        |
| CDR2-FR3 | <b>IGLV1-44*01</b>           | 99/99       | ENNQRPSGVPDRF             | ✓ | ✓ |   | ✓ | 26,3       | 27,7      | \          | 27,8       |
|          | IGLV1-44*02                  | NA          |                           |   |   |   |   |            |           |            |            |
|          | <b>IGLV1-47*01</b>           | 94/99       |                           |   |   |   |   |            |           |            |            |
|          | IGLV1-47*02                  | 22/99       |                           |   |   |   |   |            |           |            |            |
|          | IGLV1-47*03                  | 0/99        |                           |   |   |   |   |            |           |            |            |
|          | <b>IGLV1-51*02</b>           | 25/99       |                           |   |   |   |   |            |           |            |            |
|          | IGLV6-57*01                  | 43/99       |                           |   |   |   |   |            |           |            |            |
|          | <b>IGLV6-57*02</b>           | 68/99       |                           |   |   |   |   |            |           |            |            |
|          | IGLV6-57*03                  | 25/99       |                           |   |   |   |   |            |           |            |            |
|          | IGLV6-57*04                  | NA          |                           |   |   |   |   |            |           |            |            |
| CDR2-FR3 | IGLV6-57*01                  | 43/99       | ENNQRPSGVPDRFSGSIDSSNSASL | ✓ | ✓ |   | ✓ | 36,6       | 35,9      | 22,6       | 21,8       |
|          | <b>IGLV6-57*02</b>           | 68/99       |                           |   |   |   |   |            |           |            |            |
|          | IGLV6-57*03                  | 25/99       |                           |   |   |   |   |            |           |            |            |
|          | IGLV6-57*04                  | NA          |                           |   |   |   |   |            |           |            |            |
| CDR2-FR3 | <b>IGLV2-14*01</b>           | 64/99       | EVSNRPSGISNRF             |   | ✓ |   |   | \          | 23,2      | 22,6       | 22,9       |
| CDR2-FR3 | <b>IGLV2-14*01</b>           | 64/99       | EVTNRPSGVSNRF             |   | ✓ |   |   | 28,0       | 24,0/25,6 | 31,2       | 17,8       |
| CDR2-FR3 | <b>IGKV3-20*01</b>           | 99/99       | GASNRATGIPDRF             |   |   |   | ✓ | \          | \         | \          | 21,4       |



|              |                              |             |                   |  |  |   |   |   |            |           |            |            |  |
|--------------|------------------------------|-------------|-------------------|--|--|---|---|---|------------|-----------|------------|------------|--|
|              | <b>IGKV3D-11*01</b>          | 80/99       |                   |  |  |   |   |   |            |           |            |            |  |
|              | IGKV3D-11*02                 | 58/99       |                   |  |  |   |   |   |            |           |            |            |  |
|              | IGKV3D-11*03                 | 0/99        |                   |  |  |   |   |   |            |           |            |            |  |
| CDR2-FR3     | <b>IGHV5-51*05</b>           | 0/99        | IYPGDSSTRY        |  |  | ✓ |   |   | \          | \         | 35,9       | \          |  |
| CDR2         | <b>IGHV2-5*03</b>            | NA          | IYWDDDK           |  |  |   |   | ✓ | \          | 39,4      | 39,2       | 39,2       |  |
| FR2-CDR2     | <b>IGHV2-70*02</b>           | 0/99        | LALIDWDDDK        |  |  | ✓ |   |   | 57,6/53,2  | 57,5      | 53,7       | \          |  |
|              | <b>IGHV2-70*07</b>           | 0/99        |                   |  |  |   |   |   |            |           |            |            |  |
| FR2-CDR2     | <b>IGHV2-70*05</b>           | 0/99        | LARIDWDDDK        |  |  |   |   | ✓ | 29,6/55,6  | 27,4      | \          | 30,6       |  |
| FR3-CDR3     | <b>IGHV7-4-1*05/IGHJ6*04</b> | 0/99 + 1/99 | LATLCSAEVCQCAEGK  |  |  |   |   | ✓ | \          | \         | \          | 60,2       |  |
| CDR2-FR3     | <b>IGKV2-28*01</b>           | NA          | LGSNRASGVPDRF     |  |  |   |   | ✓ | \          | 13,5      | 29,9       | 29,4       |  |
|              | <b>IGKV2D-28*01</b>          | NA          |                   |  |  |   |   |   |            |           |            |            |  |
| FR2-CDR2-FR3 | <b>IGKV1-33*01</b>           | NA          | LLIYDASNLETGVPSRF |  |  | ✓ | ✓ | ✓ | 73,1/101,4 | 139,5     | 125,8/52,0 | 125,7/52,6 |  |
|              | <b>IGKV1D-33*01</b>          | NA          |                   |  |  |   |   |   |            |           |            |            |  |
| FR2-CDR2-FR3 | <b>IGKV1-33*01</b>           | NA          | LLIYDASNLTGVPSRF  |  |  | ✓ |   |   | 139,9      | \         | \          | \          |  |
|              | <b>IGKV1D-33*01</b>          | NA          |                   |  |  |   |   |   |            |           |            |            |  |
| FR2-CDR2-FR3 | <b>IGLV1-51*01</b>           | 98/99       | LLIYDNNK          |  |  | ✓ |   | ✓ | 53,1       | 43,1/47,8 | 47,3/47,5  | 47,6       |  |
| FR2-CDR2-FR3 | <b>IGHV1-69*03</b>           | 0/99        | MGGIIPFATPNY      |  |  | ✓ |   | ✓ | 22,9       | \         | \          | 21,4       |  |
| FR2-CDR2-FR3 | <b>IGHV1-69*03</b>           | 0/99        | MGGIIPFGTANY      |  |  | ✓ | ✓ | ✓ | 47,0       | 44,9      | 26,8       | 22,4       |  |
| FR2-CDR2-FR3 | <b>IGHV5-51*05</b>           | 0/99        | MGIYPGDSSTRY      |  |  |   | ✓ |   | 78,3/78,3  | 78,2      | 45,2       | \          |  |
| FR2-CDR2     | IGHV5-10-1*01                | 22/99       | MGRIDPSDSY        |  |  |   |   | ✓ | \          | \         | 39,0       | \          |  |
|              | IGHV5-10-1*02                | 0/99        |                   |  |  |   |   |   |            |           |            |            |  |
|              | <b>IGHV5-10-1*03</b>         | 57/99       |                   |  |  |   |   |   |            |           |            |            |  |
|              | IGHV5-10-1*04                | 0/99        |                   |  |  |   |   |   |            |           |            |            |  |
| FR2-CDR2-FR3 | IGHV1-69*02                  | 13/99       | MGRIPILGIANY      |  |  | ✓ | ✓ | ✓ | 56,4       | 51,0      | 54,4       | 50,2/29,1  |  |
|              | <b>IGHV1-69*04</b>           | 27/99       |                   |  |  |   |   |   |            |           |            |            |  |
|              | IGHV1-69*09                  | 8/99        |                   |  |  |   |   |   |            |           |            |            |  |
| CDR2-FR3     | <b>IGLV1-44*01</b>           | 99/99       | NNNQRPSPVPDRF     |  |  |   |   | ✓ | 27,6       | 25,9/24,5 | 26,0       | 3,7        |  |
|              | IGLV1-44*02                  | NA          |                   |  |  |   |   |   |            |           |            |            |  |
|              | <b>IGLV1-47*02</b>           | 22/99       |                   |  |  |   |   |   |            |           |            |            |  |
| CDR2-FR3     | <b>IGLV1-44*01</b>           | 99/99       | NNNQRPSPVPDRFSGSK |  |  |   |   | ✓ | 26,6       | 27,2      | \          | \          |  |





|              |                      |       |                             |   |   |   |   |      |      |      |      |  |
|--------------|----------------------|-------|-----------------------------|---|---|---|---|------|------|------|------|--|
|              | IGHV3-30*09          | 0/99  |                             |   |   |   |   |      |      |      |      |  |
|              | IGHV3-30*10          | 0/99  |                             |   |   |   |   |      |      |      |      |  |
|              | IGHV3-30*11          | 0/99  |                             |   |   |   |   |      |      |      |      |  |
|              | IGHV3-30*12          | 0/99  |                             |   |   |   |   |      |      |      |      |  |
|              | IGHV3-30*13          | 0/99  |                             |   |   |   |   |      |      |      |      |  |
|              | IGHV3-30*14          | 0/99  |                             |   |   |   |   |      |      |      |      |  |
|              | IGHV3-30*15          | 0/99  |                             |   |   |   |   |      |      |      |      |  |
|              | IGHV3-30*16          | 0/99  |                             |   |   |   |   |      |      |      |      |  |
|              | IGHV3-30*17          | 0/99  |                             |   |   |   |   |      |      |      |      |  |
|              | <b>IGHV3-30*18</b>   | 93/99 |                             |   |   |   |   |      |      |      |      |  |
|              | IGHV3-30*19          | 0/99  |                             |   |   |   |   |      |      |      |      |  |
|              | IGHV3-30*20          | NA    |                             |   |   |   |   |      |      |      |      |  |
|              | <b>IGHV3-30-3*01</b> | 70/99 |                             |   |   |   |   |      |      |      |      |  |
|              | IGHV3-30-3*02        | 0/99  |                             |   |   |   |   |      |      |      |      |  |
|              | IGHV3-30-3*03        | NA    |                             |   |   |   |   |      |      |      |      |  |
|              | <b>IGHV3-30-5*01</b> | NA    |                             |   |   |   |   |      |      |      |      |  |
|              | <b>IGHV3-33*05</b>   | 0/99  |                             |   |   |   |   |      |      |      |      |  |
| FR2-CDR2-FR3 | <b>IGHV1-69*03</b>   | 0/99  | VRQAPGQGLEWMGGFIPAFGTPVY    |   |   | ✓ |   | \    | \    | 20,8 | \    |  |
| FR2-CDR2-FR3 | <b>IGHV1-69*03</b>   | 0/99  | VRQAPGQGLEWMGGIIPFGTANY     | ✓ |   |   |   | 40,1 | 32,2 | \    | \    |  |
| FR2-CDR2-FR3 | <b>IGHV3-13*01</b>   | 77/99 | VSAIGTAGDITYPGSVK           | ✓ | ✓ | ✓ |   | 70,8 | 71,5 | 56,3 | \    |  |
|              | IGHV3-13*03          | 0/99  |                             |   |   |   |   |      |      |      |      |  |
|              | IGHV3-13*04          | 22/99 |                             |   |   |   |   |      |      |      |      |  |
| FR2-CDR2-FR3 | <b>IGHV3-74*01</b>   | 99/99 | VSRINSDGSSTSY               |   |   | ✓ | ✓ | 48,9 | 32,1 | 60,0 | \    |  |
|              | IGHV3-74*02          | 0/99  |                             |   |   |   |   |      |      |      |      |  |
| CDR2-FR3     | IGLV3-21*01          | 0/99  | YSDRPSGIPERF                |   |   |   | ✓ | 31,3 | \    | 30,3 | \    |  |
|              | <b>IGLV3-21*04</b>   | 56/99 |                             |   |   |   |   |      |      |      |      |  |
| CDR2-FR3     | IGLV3-21*01          | 0/99  | YNSDRPSGIPERF               |   |   | ✓ |   | \    | 20,9 | \    | 18,2 |  |
|              | <b>IGLV3-21*04</b>   | 56/99 |                             |   |   |   |   |      |      |      |      |  |
| FR3-CDR3     | <b>IGKV5-2*01</b>    | 93/99 | YSFCTDHTVL                  |   |   | ✓ |   | \    | 20,4 | \    | 26,7 |  |
| FR2-CDR2-FR3 | <b>IGLV6-57*02</b>   | 68/99 | YQQRPGSAPTTVIYENNQRPSGVPDRF |   |   |   | ✓ | \    | \    | \    | 38,5 |  |

|              |                    |       |                             |  |  |  |  |   |   |   |   |      |
|--------------|--------------------|-------|-----------------------------|--|--|--|--|---|---|---|---|------|
|              | IGLV6-57*03        | 25/99 |                             |  |  |  |  |   |   |   |   |      |
|              | IGLV6-57*04        | NA    |                             |  |  |  |  |   |   |   |   |      |
| FR2-CDR2-FR3 | <b>IGLV6-57*01</b> | 43/99 | YQQRPGSSPTTVIYENNQRPSGVPDRF |  |  |  |  | ✓ | \ | \ | \ | 23,7 |

Peptides that were higher before vaccination - *De novo* sequencing  
(no discriminatory peptides were identified using an Uniprot *Homo sapiens* database search)

| Region       | Subject_ID          | Allelic frequency observed in (2) | Sequence            | <i>De novo</i> | PLS-DA Discriminatory peptides |        |        |        | PEAKS <i>de novo</i> Score (%) |        |        |        |
|--------------|---------------------|-----------------------------------|---------------------|----------------|--------------------------------|--------|--------|--------|--------------------------------|--------|--------|--------|
|              |                     |                                   |                     |                | Exp. 1                         | Exp. 2 | Exp. 3 | Exp. 4 | Exp. 1                         | Exp. 2 | Exp. 3 | Exp. 4 |
| FR3-CDR3     | <b>IGKV2-28*01</b>  | NA                                | LCMAALK             | ✓              |                                |        |        | ✓      | 93                             | 96/93  | \      | 91     |
|              | <b>IGKV2D-28*01</b> | 99/99                             |                     |                |                                |        |        |        |                                |        |        |        |
| FR2-CDR2-FR3 | <b>IGKV1-33*01</b>  | NA                                | LYNASNLETGVARY      | ✓              |                                | ✓      |        |        | 89                             | 89     | \      | \      |
|              | <b>IGKV1D-33*01</b> | NA                                |                     |                |                                |        |        |        |                                |        |        |        |
| FR2-CDR2-FR3 | <b>IGKV1-33*01</b>  | NA                                | LYNVSNLETGVPSRF     | ✓              |                                | ✓      |        |        | 98                             | 98     | \      | \      |
|              | <b>IGKV1D-33*01</b> | NA                                |                     |                |                                |        |        |        |                                |        |        |        |
| CDR2-FR3     | <b>IGHV3-11*01</b>  | 78/99                             | NGATLNYADSVK        | ✓              |                                | ✓      |        |        | 97                             | 97     | \      | \      |
|              | IGHV3-11*04         | 2/99                              |                     |                |                                |        |        |        |                                |        |        |        |
|              | <b>IGHV3-21*07</b>  | NA                                |                     |                |                                |        |        |        |                                |        |        |        |
|              | <b>IGHV3-48*03</b>  | 34/99                             |                     |                |                                |        |        |        |                                |        |        |        |
| FR1-CDR1     | <b>IGLV1-62*01</b>  | 0/99                              | SGTLACTGSLVNNTTGFVY | ✓              | ✓                              |        |        |        | 84                             | \      | \      | \      |
